# Supplementary material for: Magnetically induced construction of core–shell architecture Fe3O4@TiO2–Co nanocomposites for effective photocatalytic degradation of tetracycline
Source: Royal Society of Chemistry journal article supplement (doi:10.1039/d3nj02080k), 2023-01-01
Supplement: d3nj02080k1.pdf [file d3nj02080k1.pdf]

## Supporting Information

### **Magnetic induced construction of core-shell architecture Fe<sub>3</sub>O<sub>4</sub>@TiO<sub>2</sub>-Co nanocomposites for effective photocatalytic degradation of tetracycline**

*Qingmei Tan,<sup>#a</sup> Wensheng Zhang,<sup>#b</sup> Tianren Liu,<sup>a</sup> Ying He,<sup>b</sup> Yuangong Ma,<sup>b</sup> Yingxin Yang<sup>a</sup>, Dongxue Han<sup>a, c\*</sup> Dongdong Qin<sup>a\*</sup> and Li Niu<sup>a</sup>*

*<sup>a</sup> School of Chemistry and Chemical Engineering Guangzhou Key Laboratory of Sensing Materials & Devices, Center for Advanced Analytical Science, Guangzhou University, Guangzhou 510006, P. R. China*

*<sup>b</sup> School of Civil Engineering c/o Center for Advanced Analytical Science, Guangzhou University, Guangzhou 510006, P. R. China*

*<sup>c</sup> Guangdong Provincial Key Laboratory of Psychoactive Substances Monitoring and Safety, Anti-Drug Technology Center of Guangdong Province, Guangzhou 510230, P. R. China*

*\*E-mail: dxhan@gzhu.edu.cn, ccqindd@gzhu.edu.cn*

*#These authors contributed equally to this work.*

## Supporting Figures:

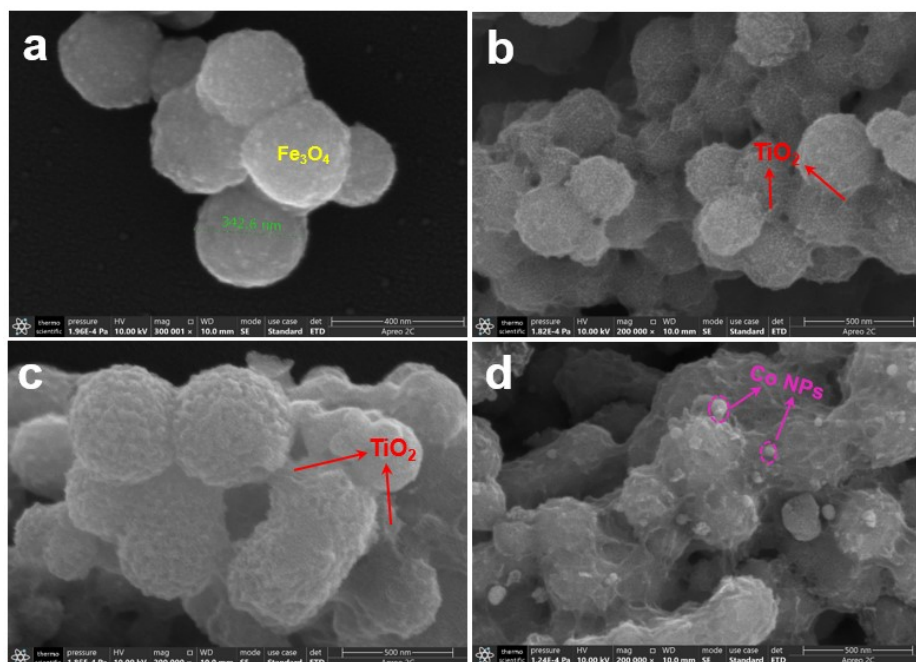

**Fig. S1** SEM images of Fe<sub>3</sub>O<sub>4</sub> nanospheres (a), Fe<sub>3</sub>O<sub>4</sub>@TiO<sub>2</sub> (b), Fe<sub>3</sub>O<sub>4</sub>@TiO<sub>2</sub> with a higher resolution (c) and Fe<sub>3</sub>O<sub>4</sub>@TiO<sub>2</sub>-Co-2.7 (d).

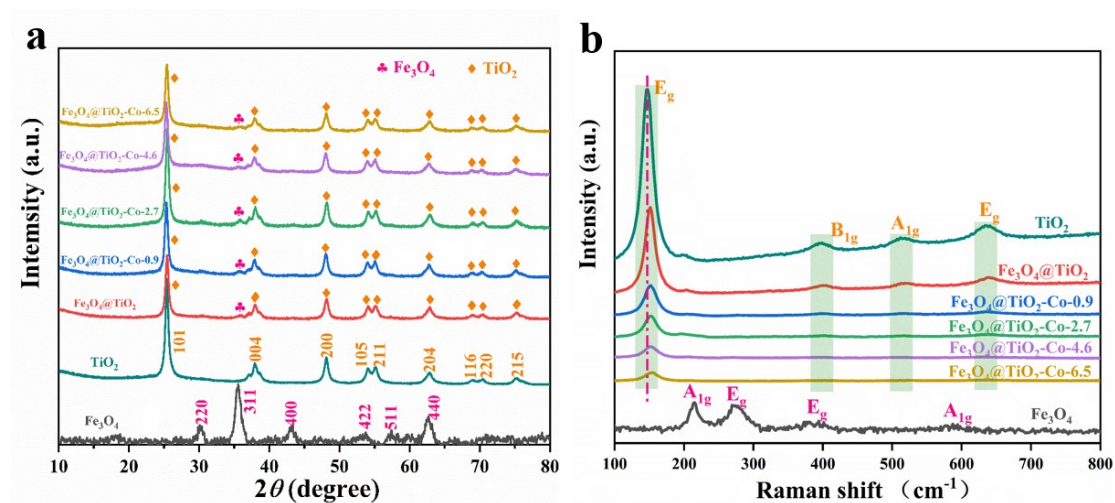

**Fig. S2** X-ray diffraction patterns (a) and Raman spectra (b) of the as-prepared samples. (New supplemented data)

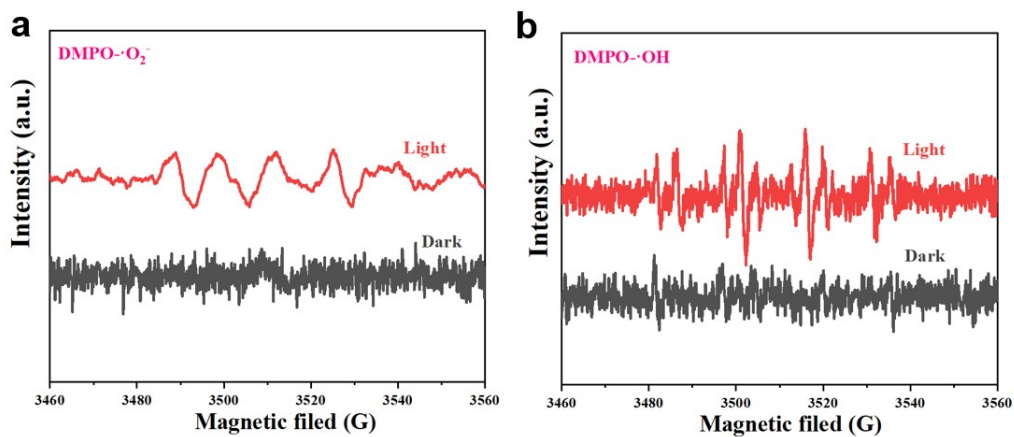

**Fig. S3** Photocatalyst  $\text{Fe}_3\text{O}_4@\text{TiO}_2\text{-Co-2.7}$  EPR spectra of DMPO -  $\text{O}_2^-$  (a) and DMPO -  $\cdot\text{OH}$  (B) in darkness and light for 5 min.

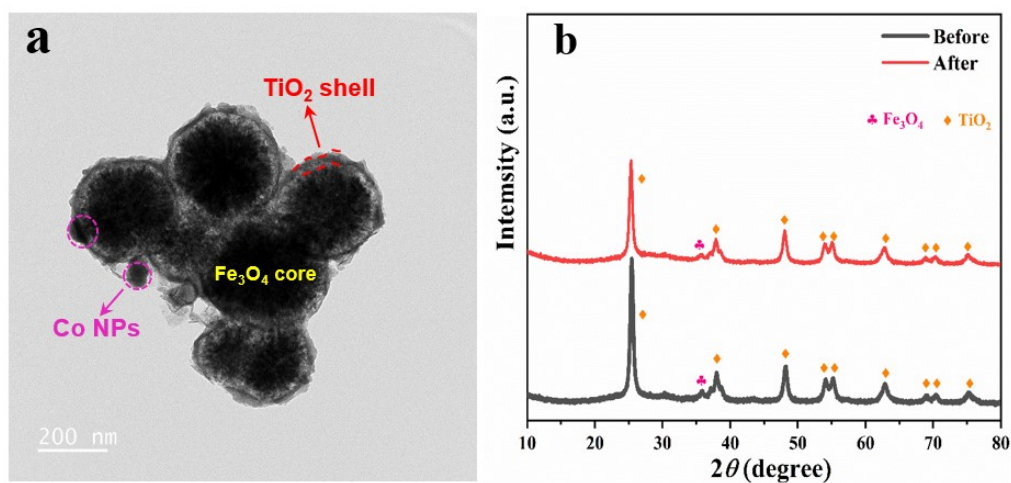

**Fig. S4** TEM image (a) of the  $\text{Fe}_3\text{O}_4@\text{TiO}_2\text{-Co-2.7}$  after cycling test; XRD patterns (b) of  $\text{Fe}_3\text{O}_4@\text{TiO}_2\text{-Co-2.7}$  before and after cycle experiments of photocatalytic degradation of TC. (New supplemented data)

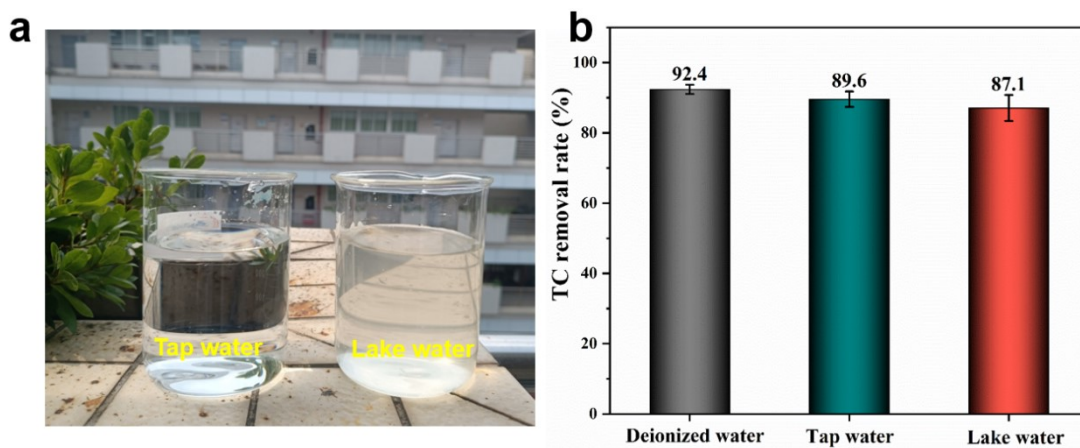

**Fig. S5** (a) Photos of the as-collected water bodies (tap water and lake water); (b) Photocatalytic degradation of TC by  $\text{Fe}_3\text{O}_4@\text{TiO}_2\text{-Co-2.7}$  in different water quality. (New supplemented data)

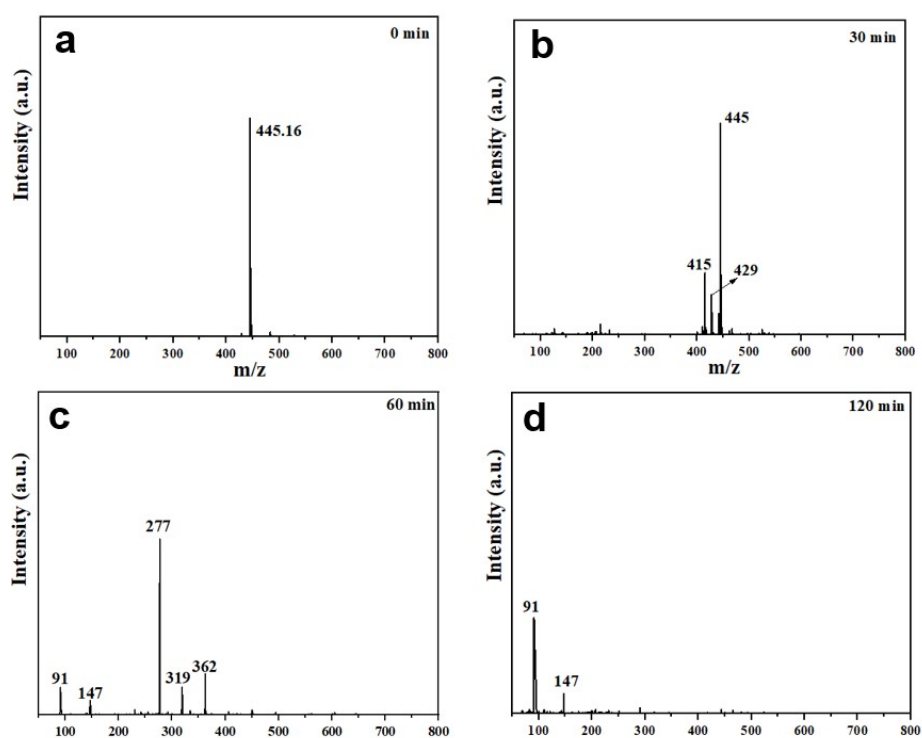

**Fig. S6** The m/z of degraded TC: (a) TC in 0 min, (b) degradation of TC in 30 min, (c) 60 min and (d) 120 min. (New supplemented data)

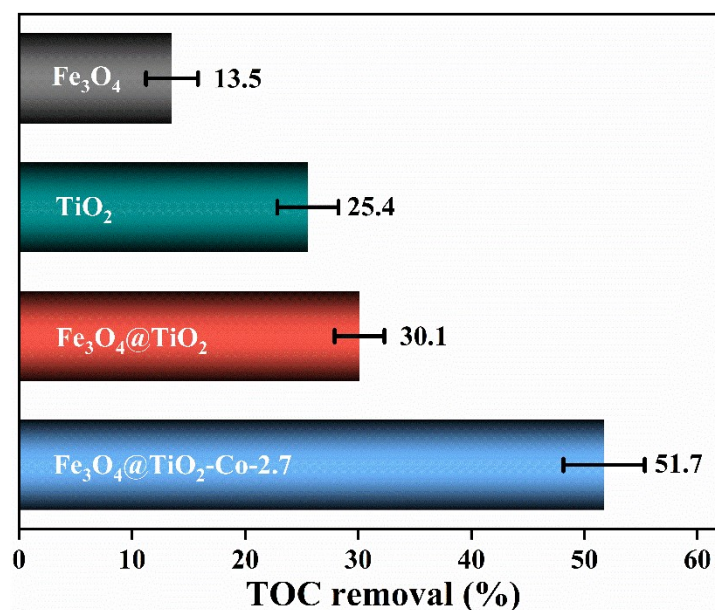

**Fig. S7** Comparison of TOC removal efficiency at 120 min of reaction using Fe<sub>3</sub>O<sub>4</sub>, TiO<sub>2</sub>, Fe<sub>3</sub>O<sub>4</sub>@TiO<sub>2</sub>, and Fe<sub>3</sub>O<sub>4</sub>@TiO<sub>2</sub>-Co-2.7. (New supplemented data)

### Supporting Tables:

**Table S1.** The content of Co loaded on the Fe<sub>3</sub>O<sub>4</sub>@TiO<sub>2</sub>-Co-x% samples was determined by ICP-OES.

| Samples  | Fe <sub>3</sub> O <sub>4</sub> @TiO <sub>2</sub> -Co-1% | Fe <sub>3</sub> O <sub>4</sub> @TiO <sub>2</sub> -Co-3% | Fe <sub>3</sub> O <sub>4</sub> @TiO <sub>2</sub> -Co-5% | Fe <sub>3</sub> O <sub>4</sub> @TiO <sub>2</sub> -Co-7% |
|----------|---------------------------------------------------------|---------------------------------------------------------|---------------------------------------------------------|---------------------------------------------------------|
| Co (wt%) | 0.9                                                     | 2.7                                                     | 4.6                                                     | 6.5                                                     |

**Table S2.** The fitting values of the equivalent circuit elements for the various samples. (New supplemented data)

| Samples                                                  | Fitting R <sub>s</sub> (Ω) | Fitting C <sub>dl</sub> (×10 <sup>-5</sup> F) | Fitting R <sub>ct</sub> (kΩ) |
|----------------------------------------------------------|----------------------------|-----------------------------------------------|------------------------------|
| Fe <sub>3</sub> O <sub>4</sub>                           | 28.7                       | 4.76                                          | 4.00                         |
| Fe <sub>3</sub> O <sub>4</sub> @TiO <sub>2</sub>         | 23.4                       | 5.83                                          | 3.12                         |
| Fe <sub>3</sub> O <sub>4</sub> @TiO <sub>2</sub> -Co-2.7 | 30.1                       | 7.87                                          | 0.99                         |

**Table S3.** Identification of the possible TC degradation products by HPLC-MS under simulated solar light irradiation. (New supplemented data)

| Compounds | Formula              | m/z | Proposed structure                                                                    |
|-----------|----------------------|-----|---------------------------------------------------------------------------------------|
| TC        | $C_{22}H_{24}N_2O_8$ | 445 | 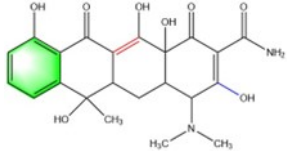   |
| TC1       | $C_{22}H_{24}N_2O_7$ | 429 |    |
| TC2       | $C_{21}H_{22}N_2O_7$ | 415 |    |
| TC3       | $C_{18}H_{19}NO_7$   | 362 |   |
| TC4       | $C_{17}H_{18}O_6$    | 319 |  |
| TC5       | $C_{15}H_{16}O_5$    | 274 |  |
| TC6       | $C_4H_2O_6$          | 147 |  |
| TC7       | $C_2H_2O_4$          | 91  |  |

**Table S4.** The content of Co and Fe ions in reaction solution after different light radiation time was determined by ICP-MS. **(New supplemented data)**

| Sample                                                       | Light radiation time | Content of Co ions in reaction solution (mg L <sup>-1</sup> ) | Content of Fe ions in reaction solution (mg L <sup>-1</sup> ) |
|--------------------------------------------------------------|----------------------|---------------------------------------------------------------|---------------------------------------------------------------|
| Fe <sub>3</sub> O <sub>4</sub> @TiO <sub>2</sub> -<br>Co-2.7 | 0                    | 0.0021                                                        | 0.00037                                                       |
|                                                              | 1 h                  | 0.0023                                                        | 0.00038                                                       |
|                                                              | 2 h                  | 0.0026                                                        | 0.00041                                                       |

**Note:** We investigated the content of Co and Fe ions in the solution after different reaction time (0, 1 h, and 2 h) by ICP-MS (as listed in Table S4). The results demonstrate that trace Co and Fe ions are indeed leached from samples during the process of photocatalytic reaction. The concentration of Co and Fe ions in the solution increases with prolonged time of photocatalytic reaction. It is worth noting that the content of Co and Fe leached during the photocatalytic reaction is very low.
